# Supplementary material for: Aerodynamic analysis of SARS-CoV-2 in two Wuhan hospitals
Source: Springer Nature journal article supplement (doi:10.1038/s41586-020-2271-3), 2020-04-27
Supplement: 41586_2020_2271_MOESM2_ESM.pdf [file 41586_2020_2271_MOESM2_ESM.pdf]

## Reporting Summary

Nature Research wishes to improve the reproducibility of the work that we publish. This form provides structure for consistency and transparency in reporting. For further information on Nature Research policies, see [Authors & Referees](#) and the [Editorial Policy Checklist](#).

### Statistics

For all statistical analyses, confirm that the following items are present in the figure legend, table legend, main text, or Methods section.

n/a Confirmed

- The exact sample size ( $n$ ) for each experimental group/condition, given as a discrete number and unit of measurement
- A statement on whether measurements were taken from distinct samples or whether the same sample was measured repeatedly
- The statistical test(s) used AND whether they are one- or two-sided  
*Only common tests should be described solely by name; describe more complex techniques in the Methods section.*
- A description of all covariates tested
- A description of any assumptions or corrections, such as tests of normality and adjustment for multiple comparisons
- A full description of the statistical parameters including central tendency (e.g. means) or other basic estimates (e.g. regression coefficient) AND variation (e.g. standard deviation) or associated estimates of uncertainty (e.g. confidence intervals)
- For null hypothesis testing, the test statistic (e.g.  $F$ ,  $t$ ,  $r$ ) with confidence intervals, effect sizes, degrees of freedom and  $P$  value noted  
*Give  $P$  values as exact values whenever suitable.*
- For Bayesian analysis, information on the choice of priors and Markov chain Monte Carlo settings
- For hierarchical and complex designs, identification of the appropriate level for tests and full reporting of outcomes
- Estimates of effect sizes (e.g. Cohen's  $d$ , Pearson's  $r$ ), indicating how they were calculated

*Our web collection on [statistics for biologists](#) contains articles on many of the points above.*

### Software and code

Policy information about [availability of computer code](#)

Data collection

NONE

Data analysis

QuantaSoft analysis software v.1.7.4.0917 (Bio-Rad) was used for analysis of the ddPCR data.

For manuscripts utilizing custom algorithms or software that are central to the research but not yet described in published literature, software must be made available to editors/reviewers. We strongly encourage code deposition in a community repository (e.g. GitHub). See the Nature Research [guidelines for submitting code & software](#) for further information.

### Data

Policy information about [availability of data](#)

All manuscripts must include a [data availability statement](#). This statement should provide the following information, where applicable:

- Accession codes, unique identifiers, or web links for publicly available datasets
- A list of figures that have associated raw data
- A description of any restrictions on data availability

All data generated and analysed during this study are included in the Article and its Supplementary Information files, which include an additional Excel file containing Source Data for Fig. 1 and all raw data.

### Field-specific reporting

Please select the one below that is the best fit for your research. If you are not sure, read the appropriate sections before making your selection.

- Life sciences       Behavioural & social sciences       Ecological, evolutionary & environmental sciences

## Ecological, evolutionary & environmental sciences study design

All studies must disclose on these points even when the disclosure is negative.

|                                   |                                                                                                                                                                                                                                                                                                                                                                                         |
|-----------------------------------|-----------------------------------------------------------------------------------------------------------------------------------------------------------------------------------------------------------------------------------------------------------------------------------------------------------------------------------------------------------------------------------------|
| Study description                 | This study investigated the aerodynamic nature and aerosol transmission of SARS-CoV-2 aerosol in Wuhan under strict quarantine and travel restriction during the peak of COVID-19 outbreak.                                                                                                                                                                                             |
| Research sample                   | Total of 35 distinct samples of three types, total suspended particle, size segregated and aerosol deposition were collected.                                                                                                                                                                                                                                                           |
| Sampling strategy                 | We sampled three types of virus aerosol samples at 30 sites covering patient and medical staff areas inside hospitals and in public areas in Wuhan. The sampling was designed to identify the hotspots of airborne SARS-CoV-2 and investigate their sources, and seek for evidences of their aerosol transmission across different isolation zones and air-surface transfer mechanisms. |
| Data collection                   | We collected two batches of samples from Feb 17 to Feb 24, 2020 and on Mar 2, 2020 respectively.                                                                                                                                                                                                                                                                                        |
| Timing and spatial scale          | Sampling durations range from 5 to 20 hours for total suspended particle and size segregated samples and 7 days for aerosol deposition samples. Sampling air volumes range from 1.5 m <sup>3</sup> to 8.9 m <sup>3</sup> .                                                                                                                                                              |
| Data exclusions                   | No data were excluded in this work.                                                                                                                                                                                                                                                                                                                                                     |
| Reproducibility                   | The samples were distinct by design in this study due to the unique conditions inside the hospitals during COVID-19 outbreak.                                                                                                                                                                                                                                                           |
| Randomization                     | This study categorized sampling locations by functions and user groups. Each sample has served different purposes so no randomization was attempted.                                                                                                                                                                                                                                    |
| Blinding                          | The sampling process itself has no impact on the study subject and data integrity by the nature of study, so no blinding was attempted.                                                                                                                                                                                                                                                 |
| Did the study involve field work? | <input checked="" type="checkbox"/> Yes <input type="checkbox"/> No                                                                                                                                                                                                                                                                                                                     |

## Field work, collection and transport

|                          |                                                                                                                                                   |
|--------------------------|---------------------------------------------------------------------------------------------------------------------------------------------------|
| Field conditions         | The sampling sites include indoor of hospital function areas and outdoor in public areas in Wuhan under strict quarantine and travel restriction. |
| Location                 | We sampled SARS-CoV-2 aerosol samples at 30 sites in two designated hospitals and public areas in Wuhan.                                          |
| Access and import/export | This field study didn't involve any study objects that require permission so no approval is needed.                                               |
| Disturbance              | The sampling process has no disturbance of the subjects.                                                                                          |

## Reporting for specific materials, systems and methods

We require information from authors about some types of materials, experimental systems and methods used in many studies. Here, indicate whether each material, system or method listed is relevant to your study. If you are not sure if a list item applies to your research, read the appropriate section before selecting a response.

### Materials & experimental systems

|                                     |                                                      |
|-------------------------------------|------------------------------------------------------|
| n/a                                 | Included in the study                                |
| <input checked="" type="checkbox"/> | <input type="checkbox"/> Antibodies                  |
| <input checked="" type="checkbox"/> | <input type="checkbox"/> Eukaryotic cell lines       |
| <input checked="" type="checkbox"/> | <input type="checkbox"/> Palaeontology               |
| <input checked="" type="checkbox"/> | <input type="checkbox"/> Animals and other organisms |
| <input checked="" type="checkbox"/> | <input type="checkbox"/> Human research participants |
| <input checked="" type="checkbox"/> | <input type="checkbox"/> Clinical data               |

### Methods

|                                     |                                                 |
|-------------------------------------|-------------------------------------------------|
| n/a                                 | Included in the study                           |
| <input checked="" type="checkbox"/> | <input type="checkbox"/> ChIP-seq               |
| <input checked="" type="checkbox"/> | <input type="checkbox"/> Flow cytometry         |
| <input checked="" type="checkbox"/> | <input type="checkbox"/> MRI-based neuroimaging |
