# Supplementary material for: Aerodynamic analysis of SARS-CoV-2 in two Wuhan hospitals
Source: Springer Nature journal article supplement (doi:10.1038/s41586-020-2271-3), 2020-04-27
Supplement: 41586_2020_2271_MOESM3_ESM.pdf [file 41586_2020_2271_MOESM3_ESM.pdf]

**Peer Review File**

**Manuscript Title:** SARS-Cov-2 Aerosol Concentration and Aerodynamic Property in Wuhan during Outbreak

**Reviewer Comments & Author Rebuttals****Reviewer Reports on the Initial Version:**

Referee #1 (Remarks to the Author):

**A. Summary of the key results**

1. Viral RNA was detected in air at non-negligible concentrations. To add my own interpretation, the levels were high enough in crowded public areas to result in inhalation exposure to 1 copy of viral RNA in about 15 minutes.
2. The majority of viral RNA in air was associated with aerosols smaller than 2.5 microns. This is a very important finding because such aerosols can remain suspended in air for 2 hours and longer.
3. Measurable deposition of aerosols onto the floor, and presumably other surfaces, can occur at distances of 2-3 m from an infected person. The implications are that transmission can then occur via contact with the deposited viruses and that they can subsequently be resuspended in air if disturbed.
4. The major caveat, not stated by the authors, is that they measured viral RNA, not infectious virus. Work published earlier this week in NEJM showed that virus in aerosols <5 microns has a half-life against biological decay of ~1 hour, so the viruses detected in this study certainly could be infectious, but we do not know for sure. Another limitation is that the sample size, especially for the size distributions, is small ( $n = 3$ ).

**B. Originality and significance: if not novel, please include reference**

The work is highly original and represents a precious data set. Understanding how COVID-19 transmits is critical to slowing its spread, especially via viruses in air. Data about size distributions of the virus, such as presented here, are absolutely necessary to make predictions about the fate of the virus in air. To my knowledge, this is only the second report of measurements of SARS-CoV-2 in air and the first to document concentrations in public areas, outside of patient rooms.

**C. Data & methodology: validity of approach, quality of data, quality of presentation**

The sampling and analysis methods are valid.

**D. Appropriate use of statistics and treatment of uncertainties**

The sample size is too small to allow for statistical treatment.

**E. Conclusions: robustness, validity, reliability**

The conclusions are overstated because of the small sample size but they are valuable anyway because of the paucity of knowledge about this virus.

**F. Suggested improvements: experiments, data for possible revision**

None. It is important for these data to be published, despite their limitations.

**G. References: appropriate credit to previous work?**

If the authors wish to hypothesize about resuspension of viruses from PPE, they should at least cite some work about the resuspension of particles from clothing and other surfaces.

**H. Clarity and context: lucidity of abstract/summary, appropriateness of abstract, introduction and conclusions**

Language usage, while understandable, has minor grammatical errors and is awkward in spots and would greatly benefit from editing.

1. line 45: The abstract MUST state that virus was detected by molecular methods and that infectivity is not known. This point should also be made later in the text.
2. line 47: Clarify what is meant by "patient toilet air".
3. lines 48-49: "The airborne SARS-CoV-2 concentration in public areas is generally undetectable but increased with accumulating crowd..." This statement is contradictory and unclear. If concentrations were above the detection limit in crowded public areas, then they were not generally undetectable. If the concentration was below the detection limit and increased with crowds, then did it increase while still being below the detection limit? The wording needs to be more precise.
4. lines 49-50: "clearly indicating asymptomatic carriers in the crowd are a potential source of airborne SARS-CoV-2." How do the authors know that all in the crowd were asymptomatic? Isn't it possible that some of the people had symptoms? If there is no direct evidence that everyone in the crowd was asymptomatic, then this statement requires correction.
5. line 102: Please describe the "patient mobile toilet room" in more detail. Is this a trailer with multiple toilets and stalls? How big is it? Does it have mechanical ventilation?
6. lines 112-114: "...one crowd gathering site about 1 meter to the entrance of a department store...the other site next to Renmin Hospital" Describe whether these sites were inside or outside the building.
7. lines 122-123: "during the 3 hour sampling period" Additional information about sampling duration should be provided. Was it 3 hours for all samples?
8. line 140: Further description of the sanitization measures is warranted because it appears they were effective at reducing airborne viral RNA concentrations in the protective apparel removal room.
9. line 143: The bimodal size distributions described apply only to the protective apparel removal rooms (Figure 1a and 1b) not "in general." The size distribution in the medical staff office was flatter.
10. lines 150-154: "It is worth noting the two peaks in sub and supermicron ranges exist independently in SARS-CoV-2 aerosols, suggesting different formation mechanisms. We hypothesize the source of the submicron peak is the resuspension of virus-laden aerosol from the surface of medical staff protective apparel while they are being removed..." Given there is only one sample from each of three different rooms, these statements over-interpret the results. The peaks at 0.25-1.0 microns are worth noting, but the rest of this paragraph should be reworded. Resuspension of particles from clothing is certainly occurring; references should be cited to support this claim.
11. line 191: Additional information about the locations of the aerosol sampling within the rooms, especially relative to the patients and any air intakes and outlets. At what height were the samplers?
12. line 201: "Sampling durations and operation periods are detailed in Table S1." The table does not contain sampling durations, only dates. Sampling duration must be provided to assess how representative the samples might be.
13. Table S1: "Nature ventilation" should be "natural ventilation".

Referee #2 (Remarks to the Author):

This is a short paper describing the presence of aerosols of SARS-CoV-2 in hospitals in Wuhan, China, during the COVID-19 outbreak. The samples were collected between February 17 and March 2 of this year. The identification of such viral aerosols in a "real" setting is important and knowledge about the contribution of such aerosols to transmission is vital information in getting hold of this pandemic, which originated in Wuhan.

Several points:

- 1) Line 59, update the numbers reflecting the more recent disease pattern.
- 2) Line 66. The authors are mentioning three transmission pathways, but then discuss actually

four.

3) The fact that the toilet has a high concentration of aerosol is important, but is there evidence that virus is in urine (line 104)?

4) Line 157, sentence makes no sense.

5) Line 172. What is the evidence that wearing masks has any beneficial effect other than social distancing (and satisfies cultural habits).

#### Author Rebuttals to Initial Comments:

Referee #1 (Remarks to the Author):

A. Summary of the key results

1. Viral RNA was detected in air at non-negligible concentrations. To add my own interpretation, the levels were high enough in crowded public areas to result in inhalation exposure to 1 copy of viral RNA in about 15 minutes.

Response: We thank the reviewer for pointing out the important implication of the study findings on the exposure risk in crowded public areas.

2. The majority of viral RNA in air was associated with aerosols smaller than 2.5 microns. This is a very important finding because such aerosols can remain suspended in air for 2 hours and longer.

Response: We agree the study findings on SARS-CoV-2 aerosol size distribution are important to understand the aerosol transmission capability of the virus.

3. Measurable deposition of aerosols onto the floor, and presumably other surfaces, can occur at distances of 2-3 m from an infected person. The implications are that transmission can then occur via contact with the deposited viruses and that they can subsequently be resuspended in air if disturbed.

Response: We appreciate the reviewer's insight on the implications of virus aerosol deposition and potential airborne transmission by resuspension. This potentially is an important pathway of SARS-CoV-2 transmission that shouldn't be underestimated or neglected.

4. The major caveat, not stated by the authors, is that they measured viral RNA, not infectious virus. Work published earlier this week in NEJM showed that virus in aerosols <5 microns has a half-life against biological decay of ~1 hour, so the viruses detected in this study certainly could be infectious, but we do not know for sure. Another limitation is that the sample size, especially for the size distributions, is small (n = 3).

Response: We thank the reviewer for pointing out the limitations of our research and we fully acknowledge the reviewer's insightful comments.

Action: Regarding the comment on reported viral RNA instead of infectious virus, we have added clarifications in the Summary Paragraph:

Line 43: "This study investigated the aerodynamic nature of SARS-CoV-2 by measuring viral RNA in aerosol in Wuhan ..."

Line 56: "...can effectively limit SARS-CoV-2 aerosol concentration, although their infectivity is not known."

Action: We have also referred the recent study on the stability of virus aerosol as suggested by the

reviewer in the discussion:

Line 160: "... Furthermore, a recent study has experimentally demonstrated SARS-CoV-2 could maintain its biological stability in aerosol and on different surfaces for hours to days<sup>15</sup>".

Action: Regarding the comment on the sample size, we thank for the reviewer's reminder. We recognize this is limited by very restricted experimental condition to conduct sampling in the highly infectious zones. We also take the reviewer's suggestion to avoid overstatement in conclusions and make clarifications in discussion. The manuscript is revised:

Line 126: "Our findings, though based on a small sample size, indicate..."

Line 253: "Considering the limited experimental condition with small sample size, the integrity and robustness of experiment protocol was examined extensively in the laboratory prior to the field sampling..."

Action: We have also added a paragraph of discussion on the caveats of this study to avoid over- or mis-interpretation of the findings.

Line 164: "This study had its inherent limitations in small sample size and representation of sample viral RNA instead of virus infectivity, imposed by restricted access to the patient and medical staff areas in the epicentre of the COVID-19 outbreak."

B. Originality and significance: if not novel, please include reference

The work is highly original and represents a precious data set. Understanding how COVID-19 transmits is critical to slowing its spread, especially via viruses in air. Data about size distributions of the virus, such as presented here, are absolutely necessary to make predictions about the fate of the virus in air. To my knowledge, this is only the second report of measurements of SARS-CoV-2 in air and the first to document concentrations in public areas, outside of patient rooms.

Response: We thank for the reviewer's comment.

C. Data & methodology: validity of approach, quality of data, quality of presentation

The sampling and analysis methods are valid.

Response: We thank for the reviewer's comment.

D. Appropriate use of statistics and treatment of uncertainties

The sample size is too small to allow for statistical treatment.

Response: We thank for the reviewer's comment. We have followed the suggestions and addressed the similar comment in section A4.

E. Conclusions: robustness, validity, reliability

The conclusions are overstated because of the small sample size but they are valuable anyway because of the paucity of knowledge about this virus.

Response: We thank for the reviewer's comment. We have followed the suggestions and addressed the similar comment in section A4.

F. Suggested improvements: experiments, data for possible revision

None. It is important for these data to be published, despite their limitations.

Response: We thank for the reviewer's comment.

G. References: appropriate credit to previous work?

If the authors wish to hypothesize about resuspension of viruses from PPE, they should at least cite some work about the resuspension of particles from clothing and other surfaces.

Response: We thank for the reviewer's comment and suggestion. To support the formulation of hypothesis, we have cited a review by Prussin et al. and a recently published study by van Doremalen et al who demonstrated that SARS-CoV-2 is stable on various surfaces and resuspension of microorganisms from the floor, clothing, and furniture contributes to the formation of microorganisms aerosols in the revised manuscript.

Action: The following revisions were made in the manuscript.

Line 150: "Reports on the resuspension of microorganisms from the floor, clothing, and furniture was noted to contribute to the generation of microbial aerosols in the built environment<sup>14</sup>"

Line 160: "Furthermore, a recent study has experimentally demonstrated SARS-CoV-2 could maintain its biological stability in aerosol and on different surfaces for hours to days<sup>15</sup>."

H. Clarity and context: lucidity of abstract/summary, appropriateness of abstract, introduction and conclusions

Language usage, while understandable, has minor grammatical errors and is awkward in spots and would greatly benefit from editing.

Response: We have reviewed the entire manuscript and made editorial changes where appropriate.

1. line 45: The abstract MUST state that virus was detected by molecular methods and that infectivity is not known. This point should also be made later in the text.

Response: We thank for the reviewer's reminder and suggestions.

Action: We have revised the Summary paragraph and discussion section accordingly.

Line 43: "This study investigated the aerodynamic nature of SARS-CoV-2 by measuring viral RNA in aerosol in Wuhan ..."

Line 56: "... effectively limit SARS-CoV-2 aerosol concentration, although their infectivity is not known."

Line 170: "... are non-negligible sources of airborne SARS-CoV-2 although its infectivity is not known."

2. line 47: Clarify what is meant by "patient toilet air".

Response: Thanks for the comment.

Action: The sentence has been rewritten.

Line 45: "The SARS-CoV-2 aerosol concentration in isolation wards and ventilated patient rooms were very low but elevated in the patients' toilet room."

3. lines 48-49: "The airborne SARS-CoV-2 concentration in public areas is generally undetectable but increased with accumulating crowd..." This statement is contradictory and unclear. If concentrations were above the detection limit in crowded public areas, then they were not generally undetectable. If the concentration was below the detection limit and increased with crowds, then did it increase while still being below the detection limit? The wording needs to be more precise.

Response: Thanks for the comment.

Action: We have reorganized the sentence as follows:

Line 47: "The airborne SARS-CoV-2 concentrations in majority of public areas were undetectable except in two crowd gathering venues with elevated viral RNA levels, possibly due to the infected carriers in the crowd."

4. lines 49-50: "clearly indicating asymptomatic carriers in the crowd are a potential source of airborne SARS-CoV-2." How do the authors know that all in the crowd were asymptomatic? Isn't it possible that some of the people had symptoms? If there is no direct evidence that everyone in the crowd was asymptomatic, then this statement requires correction.

Response: Thanks for the reviewer comments and we agree on the point raised by the reviewer. Although during the time of sampling, the city of Wuhan has implemented strict quarantine and travel restrictions with large scale effort to hospitalize patients exhibiting symptoms and quarantine suspected contacts, we can't exclude possibilities that the crowd in the public may still have individuals with symptoms.

Action: To avoid the misinterpretation, we have revised the sentences in Summary paragraph and in the discussion section.

Line 48: "... except in two crowd gathering venues with elevated viral RNA levels, possibly due to the infected carriers in the crowd."

Line 115: "... it is possible that infected carriers of SARS-CoV-2 in the crowd may have contributed..."

5. line 102: Please describe the "patient mobile toilet room" in more detail. Is this a trailer with multiple toilets and stalls? How big is it? Does it have mechanical ventilation?

Action: We have added a sentence describing the patient mobile toilet room in the revised manuscript:

Line 101: "..., which is a temporary single toilet room of approximate 1 m<sup>2</sup> in area without ventilation."

6. lines 112-114: "...one crowd gathering site about 1 meter to the entrance of a department store...the other site next to Renmin Hospital" Describe whether these sites were inside or outside the building.

Response: These sites were outside the building.

Action: We have reworded the sentences in the revised manuscript.

Line 114: "While both sites were outside the building, it is possible that infected carriers of SARS-CoV-2 in the crowd ..."

7. lines 122-123: “during the 3 hour sampling period” Additional information about sampling duration should be provided. Was it 3 hours for all samples?

Response: Thanks for the comment. The sampling duration varies among the study sites due to restriction of site conditions and staff operations in different zones.

Action: We have reviewed the experiment log and included the sampling duration for all the samples in the Supplementary Table 1.

8. line 140: Further description of the sanitization measures is warranted because it appears they were effective at reducing airborne viral RNA concentrations in the protective apparel removal room.

Response: Thanks for the comment.

Action: More details were added in the revised manuscript in lines 137-140

“...including more frequent spraying of chlorinated disinfectant on the floor of patient areas, additional disinfection by 3% hydrogen peroxide in the PARR at least once a week, spraying alcohol disinfectant all over the protective apparel before taking off, and prolonged operation time of indoor air purifiers.”

9. line 143: The bimodal size distributions described apply only to the protective apparel removal rooms (Figure 1a and 1b) not “in general.” The size distribution in the medical staff office was flatter.

Response: Thanks for the reviewer’s comment.

Action: We have replaced the statement on bimodal size distribution with the following text to avoid ambiguity of statement.

Line 143: “SARS-CoV-2 aerosol mainly resides in two size ranges, one in the submicron region ( $d_p$  between 0.25 to 1.0  $\mu\text{m}$ ) and the other in supermicron region ( $d_p > 2.5 \mu\text{m}$ ).”

Line 148: “... The medical staff’s office (Figure 1c) had more virus-laden aerosol in the supermicron size range, but the size distribution is flatter compared with others.”

10. lines 150-154: “It is worth noting the two peaks in sub and supermicron ranges exist independently in SARS-CoV-2 aerosols, suggesting different formation mechanisms. We hypothesize the source of the submicron peak is the resuspension of virus-laden aerosol from the surface of medical staff protective apparel while they are being removed....” Given there is only one sample from each of three different rooms, these statements over-interpret the results. The peaks at 0.25-1.0 microns are worth noting, but the rest of this paragraph should be reworded. Resuspension of particles from clothing is certainly occurring; references should be cited to support this claim.

Response: Thanks for the reviewer’s suggestion. We agree on the points raised here.

Action: We have revised the text as follows. References on the documentation of biological aerosol resuspension from floor and clothes are added to support the formulation of hypothesis:

Line 150: “Reports on the resuspension of microorganisms from the floor, clothing, and furniture was noted to contribute to the generation of microbial aerosols in the built environment<sup>14</sup>.”

We also added a reference of recent study showing the biological stability of SARS-CoV-2 aerosol.

Line 160: " Furthermore, a recent study has experimentally demonstrated SARS-CoV-2 could maintain its biological stability in aerosol and on different surfaces for hours to days<sup>15</sup>. The submicron SARS-CoV-2 aerosol found in this study has relatively longer residence time implying they are probably still infectious during transmission."

11. line 191: Additional information about the locations of the aerosol sampling within the rooms, especially relative to the patients and any air intakes and outlets. At what height were the samplers?

Action: Additional information such as location and height of sampling inlet was included in the methods section of the revised manuscript.

Line 251: "All sampling instruments were located in the centre of the respective sampling area, where the sampling inlet was at a height of ~1.5 m from floor."

12. line 201: "Sampling durations and operation periods are detailed in Table S1." The table does not contain sampling durations, only dates. Sampling duration must be provided to assess how representative the samples might be.

Response: Thanks for the comment. The sampling duration varies among the study sites due to restriction of site conditions and staff operations in different zones.

Action: We have reviewed the experiment log and included the sampling duration for all the samples in the Supplementary Table 1.

13. Table S1: "Nature ventilation" should be "natural ventilation".

Response: We have corrected the text in the Supplementary Table 1 accordingly.

Referee #2 (Remarks to the Author):

This is a short paper describing the presence of aerosols of SARS-CoV-2 in hospitals in Wuhan, China, during the COVID-19 outbreak. The samples were collected between February 17 and March 2 of this year. The identification of such viral aerosols in a "real" setting is important and knowledge about the contribution of such aerosols to transmission is vital information in getting hold of this pandemic, which originated in Wuhan.

Several points:

1) Line 59, update the numbers reflecting the more recent disease pattern.

Response: We have updated the numbers.

2) Line 66. The authors are mentioning three transmission pathways, but then discuss actually four.



Response: We have reworded the statement in line 64 of revised manuscript.

3) The fact that the toilet has a high concentration of aerosol is important, but is there evidence that virus is in urine (line 104)?

Response: The presence of SARS-CoV-2 in urine is controversial. An earlier study by Wang et al. failed to detect SARS-CoV-2 in urine, while a recent study posted on Feb. 25th claimed they found positive results of SARS-CoV-2 in urine.

Action: We have cited both publications in line 104 of revised manuscript.

4) Line 157, sentence makes no sense.

Action: The text has been revised.

Line 158: "On the other hand, the floor deposited SARS-CoV-2 is possibly the source of supermicron virus-laden aerosol and was carried across different areas by the medical staff."

5) Line 172. What is the evidence that wearing masks has any beneficial effect other than social distancing (and satisfies cultural habits).

Response: Thanks for the comment. In this study we evidenced the existence of SARS-CoV-2 in aerosol although their concentrations in different areas are affected by the activities of medical staff, patients and the public. There are several studies suggesting that wearing face mask was a protective factor against transmission/infection, especially in indoor environments (e.g. clinics, hospital wards etc) [1-3]. We recommended wearing mask as one measure for the general public to reduce the risk of potential exposure to virus-laden aerosol at least for a short period of time.

Action: To make clarifications, we have revised the statement in the revised manuscript.

Line 175: "2) personal protection measures for the general public such as wearing masks and avoiding busy crowd to reduce the risk of airborne virus exposure "

References:

1. MacIntyre et al. Face Mask Use and Control of Respiratory Virus Transmission in Households. *Emerg Infect Dis.* 2009 Feb; 15(2): 233–241. doi: 10.3201/eid1502.081167
2. Jefferson et al. Physical interventions to interrupt or reduce the spread of respiratory viruses. *Cochrane Database Syst Rev.* 2011 Jul 6;(7):CD006207. doi: 10.1002/14651858
3. Zhang et al. Protection by Face Masks against Influenza A(H1N1)pdm09 Virus on Trans-Pacific Passenger Aircraft, 2009. *Emerg Infect Dis.* 2013 Sep; 19(9): 1403–1410. doi: 10.3201/eid1909.121765
